# Supplementary material
Source: publisher figshare collection journal article supplement (https://wiley.figshare.com/articles/dataset/_/3558960)
Supplement: Supplementary file 1 [file 1 › appendix-A.htm]

Ecological Archives E095-075-A1


*Ecological Archives* E095-075-A1

Chun-Wei Chang, Takeshi Miki, Fuh-Kwo Shiah, Shuh-ji Kao, Jiunn-Tzong Wu, Akash R. Sastri, Chih-hao Hsieh. 2014. Linking secondary structure of individual size distribution with nonlinear size–trophic level relationship in food webs. *Ecology* 95:897–909. http://dx.doi.org/10.1890/13-0742.1

Appendix A. Mathematical derivation of the generalized MTE model.

> View / download PDF.


---

[Back to E095-075]
